# Supplementary material for: Recognition and mechanistic investigation of anion sensing by ruthenium(ii) arene complexes and bio-imaging application
Source: Royal Society of Chemistry journal article supplement (doi:10.1039/d2dt01726a), 2022-01-01
Supplement: d2dt01726a1.pdf [file d2dt01726a1.pdf]

## Supporting Information

### **Recognition and Mechanistic Investigation of Anion Sensing by Ruthenium (II) Arene Complexes and Bio-Imaging application**

**Chanchal Sonkar<sup>a</sup>, Sayantan Sarkar<sup>b</sup>, Novina Malviya<sup>c</sup>, Maxim L. Kuznetsov<sup>d</sup> and Suman Mukhopadhyay<sup>b\*</sup>**

<sup>a</sup>Department of Biosciences and Biomedical Engineering, School of Engineering, Indian Institute of Technology Indore, Khandwa Road, Simrol, Indore 453552, India

<sup>b</sup>Department of Chemistry, School of Basic Sciences, Indian Institute of Technology Indore, Khandwa Road, Simrol, Indore 453552, India

<sup>c</sup>School of Chemistry and Chemical Engineering, Queen's University Belfast, UK

<sup>d</sup>Centro de Química Estrutural, Institute of Molecular Sciences, Departamento de Engenharia Química, Instituto Superior Técnico, Universidade de Lisboa, Av. Rovisco Pais, 1049-001 Lisboa, Portugal

\*E-mail: [suman@iiti.ac.in](mailto:suman@iiti.ac.in). Phone: +91 731 660 3328. Fax: +91731 2361 482.

ORCID

Suman Mukhopadhyay: 0000-0002-5314-891X

| Content                                                                                                                                                                                                                                                     | Page No. |
|-------------------------------------------------------------------------------------------------------------------------------------------------------------------------------------------------------------------------------------------------------------|----------|
| <b>Experimental section</b>                                                                                                                                                                                                                                 | S-3      |
| <b>Figure S1. IR Spectra of 1.</b>                                                                                                                                                                                                                          | S-5      |
| <b>Figure S2. IR Spectra of 2.</b>                                                                                                                                                                                                                          | S-6      |
| <b>Figure S3. IR Spectra of 3.</b>                                                                                                                                                                                                                          | S-6      |
| <b>Figure S4. IR spectra of 4.</b>                                                                                                                                                                                                                          | S-7      |
| <b>Figure S5. ESI-MS of 1</b> recorded after dissolving in MeOH at room temperature.                                                                                                                                                                        | S-8      |
| <b>Figure S6. ESI-MS of 2</b> recorded after dissolving in MeOH at room temperature.                                                                                                                                                                        | S-8      |
| <b>Figure S7. ESI-MS of 3</b> recorded after dissolving in MeOH at room temperature.                                                                                                                                                                        | S-8      |
| <b>Figure S8. ESI-MS of 4</b> recorded after dissolving in MeOH at room temperature.                                                                                                                                                                        | S-9      |
| <b>Figure S9. <sup>1</sup>H NMR of 1</b> in CDCl <sub>3</sub> at room temperature.                                                                                                                                                                          | S-9      |
| <b>Figure S10. <sup>1</sup>H NMR of 2</b> in CDCl <sub>3</sub> at room temperature.                                                                                                                                                                         | S-10     |
| <b>Figure S11. <sup>1</sup>H NMR of 3</b> in DMSO- <i>d</i> <sub>6</sub> at room temperature.                                                                                                                                                               | S-10     |
| <b>Figure S12. <sup>1</sup>H NMR of 4</b> in DMSO- <i>d</i> <sub>6</sub> at room temperature.                                                                                                                                                               | S-11     |
| <b>Figure S13. <sup>13</sup>C NMR of 1</b> in CDCl <sub>3</sub> at room temperature.                                                                                                                                                                        | S-11     |
| <b>Figure S14. <sup>13</sup>C NMR of 2</b> in CDCl <sub>3</sub> at room temperature.                                                                                                                                                                        | S-12     |
| <b>Figure S15. <sup>13</sup>C NMR of 3</b> in DMSO- <i>d</i> <sub>6</sub> at room temperature.                                                                                                                                                              | S-12     |
| <b>Figure S16. <sup>13</sup>C NMR of 4</b> in DMSO- <i>d</i> <sub>6</sub> at room temperature.                                                                                                                                                              | S-13     |
| <b>Figure S17. Stability of 1, 2, 3 and 4</b> in DMSO- <i>d</i> <sub>6</sub> at room temperature at 0h and 24 h.                                                                                                                                            | S-13     |
| <b>Figure S18. Effect of solvents on the fluorescence of 1, 2, 3 and 4</b> in DMSO- <i>d</i> <sub>6</sub> at room temperature                                                                                                                               | S-14     |
| <b>Figure S19. Effect of cations on the fluorescence of 3</b> in DMSO- <i>d</i> <sub>6</sub> at room temperature.                                                                                                                                           | S-14     |
| <b>Figure S20. Quantum Yield of 3</b> with respect to 2 amino pyridine.                                                                                                                                                                                     | S-15     |
| <b>Figure S21. B-H plot of 3</b> obtained by titration with CO <sub>3</sub> <sup>2-</sup> and SO <sub>4</sub> <sup>2-</sup> anions.                                                                                                                         | S-15     |
| <b>Table S1. Quantum yield (ϕ) of 3, 3 + CO<sub>3</sub><sup>2-</sup> and 3 + SO<sub>4</sub><sup>2-</sup> anions</b> in DMSO in comparison with the reference taken as Amino pyridine (∫ <sub>S</sub> represents the area integral of sample and reference). | S-15     |
| <b>Figure S22. JOB's plot of 3</b> on serial dilution with CO <sub>3</sub> <sup>2-</sup> and SO <sub>4</sub> <sup>2-</sup> anions.                                                                                                                          | S-16     |
| <b>Figure S23. ESI spectra for the probable interaction of 3</b> with a) CO <sub>3</sub> <sup>2-</sup> , b) SO <sub>4</sub> <sup>2-</sup> anions, respectively.                                                                                             | S-16     |
| <b>Table S2. Cartesian atomic coordinates of the equilibrium structures</b> (nuclear charges of elements are indicated in the first column).                                                                                                                | S-24     |
| <b>Figure S24. Biocompatibility of 1, 2, 3 and 4</b> on a) A375 cell line, b) MCF7 cell line, c) DU145 cell line, d) HeLa cell line.                                                                                                                        | S-25     |

## 31 EXPERIMENTAL SECTION

### 32 Stability of complexes

33 Since the stock solutions of complexes **1**, **2**, **3** and **4** were prepared in DMSO, therefore all the  
34 biological studies were carried out with 1% DMSO solution in the media. As it becomes imperative  
35 to evaluate the stability of the complexes in DMSO it was evaluated through  $^1\text{H}$  and  $^{13}\text{C}$  NMR in  
36 DMSO- $d_6$  at a time interval of 0 h, 12 h, 24 h.

37 For determining the stability of the complexes through UV spectroscopy,  $4 \times 10^{-5}$  M solution of  
38 all the complexes was prepared by adding 16  $\mu\text{L}$  from 5 mM stock solution to 1.984 mL of DMSO  
39 in cuvette and UV spectra were recorded at 0 and 24 h.

### 40 Calculation of Excited-State Lifetimes

41 The temperature-dependent fluorescence lifetime was investigated on a TCSPC system (model:  
42 Fluorescence-01-NL) equipped with a temperature-controlled cell holder. For analysing the  
43 lifetime decay data, IBH DAS 6.0 software was used. The iterative reconvolution method was  
44 used to measure the fluorescence lifetime decay, and the fit value was judged by the reduced w-  
45 square (w2) value.

46 Equations S(iii) and S(iv) were fitted to get an idea about the time-resolved emission decays where  
47 the decays of the probe,  $\text{L1} + \text{CO}_3^{2-}$  and  $\text{L1} + \text{SO}_4^{2-}$  were evaluated using a tri, bi and mono-  
48 exponential function:<sup>1</sup>

$$49 \quad F(t) = \sum_{i=1}^2 a_i \exp\left(-\frac{t}{\tau_i}\right) \quad \dots \quad \dots \quad \text{S(i)}$$

50 Where,  $F(t)$  is the PL decay at normalized condition,  $\alpha_i$  is the pre-exponential factor,  
51 and  $a_1$  and  $a_2$  denotes the normalized amplitude having decay component  $\tau_1$  and  $\tau_2$  respectively.  
52 Eqn. (iv) gives the value of average lifetime (in ns):

$$53 \quad \langle \tau \rangle = \sum_{i=1}^2 a_i \tau_i \quad \dots \quad \dots \quad \text{S(ii)}$$

54 Where,  $a_i$  is the contribution of the  $i^{\text{th}}$  decay component, and  $a_i = \alpha_i / \sum \alpha_i$ .

55

## 56 Fluorescence Quantum Yield

57 Quantum yield has been calculated according to the procedure suggested in manual “A Guide to  
58 Recording Fluorescence Quantum Yields” by HORIBA Jobin Yvon IBH Pvt. Ltd<sup>2</sup> and also  
59 followed the published procedure<sup>3</sup>. 2-Aminopyridine, which was dissolved in 0.1 M H<sub>2</sub>SO<sub>4</sub> ( $\Phi_R =$   
60 0.60) was used as reference to estimate the quantum yield (QY) values of receptor L1, L1 + CO<sub>3</sub><sup>2-</sup>  
61 and L1 + SO<sub>4</sub><sup>2-</sup> in DMSO<sup>4</sup> by using the eqn. S(v):<sup>5</sup>

$$62 \quad \Phi_s = \frac{S_s}{S_R} \times \frac{A_R}{A_S} \times \frac{\eta_s^2}{\eta_R^2} \times \Phi_R \quad \dots \quad \dots \quad \text{S(iii)}$$

63 Where ‘ $\Phi$ ’ denotes the fluorescence QY, ‘Area’ terms denote the integration of the fluorescence  
64 curve, ‘A’ denotes optical density and the refractive index as  $\eta$  ( $\eta = 1.479$  for DMSO solvent  
65 medium). While S are the slope from the plot of the integrated fluorescence intensity vs. the  
66 absorbance of the standard and the sample at different concentration respectively. Subscripts R  
67 and S stand for the respective parameters belonging to the experimental reference as well as the  
68 sample.

## 69 Effect of pH

70 The stability of complex **3** was also evaluated at different pH. The fluorescence spectra of  
71 complexes were taken after addition of 16  $\mu$ L from 5 mM complex 3 stock solution to different  
72 pH solutions prepared in milli-Q water.

## 73 Cell culture

74 Breast carcinoma cells (MCF7), Human squamous carcinoma (A431), human melanoma (A375),  
75 were purchased from NCCS (National Centre for Cell Science), Pune. All the cell lines were  
76 cultured in Dulbecco minimum essential medium (DMEM). The growth and maintenance  
77 procedure of the cell lines and materials used were as per our previous publication.<sup>6</sup>

## 78 In vitro cytotoxicity assay

79 The cells were seeded in 96-well flat-bottomed culture plate in 100  $\mu$ l cell suspension and were  
80 incubated overnight at 37 °C in a 5% CO<sub>2</sub> incubator for attachment. Complex treatment was done  
81 by making 5 mM stock solution of the complexes **1**, **2**, **3** and **4** in DMSO and then this stock

82 solution was further diluted to 160  $\mu\text{g/mL}$ , 80  $\mu\text{g/mL}$ , 40  $\mu\text{g/mL}$ , 20  $\mu\text{g/mL}$ . After 72 h treatment,  
83 the MTT experiment was carried out as per our previous publication.<sup>6</sup>

#### 84 **Bio-Imaging**

85 Complexes were evaluated for their fluorescence properties in the cells. The  $5 \times 10^4$  A375 cells  
86 were placed in confocal dishes and were incubated overnight in the  $\text{CO}_2$  incubator for attachment.  
87 The cells in confocal dishes having 2 mL of media were treated with 200  $\mu\text{L}$  of 10 mM stock  
88 solution of complexes **1** for 4 h and untreated cells were taken as control. The fluorescence was  
89 viewed by the help of Fluoview FV100 (OLYMPUS, Tokyo, Japan) fluorescence microscope  
90 using DAPI filter. The excitation wavelength of complex **1** was 330 nm and emission wavelength  
91 was 370 nm.

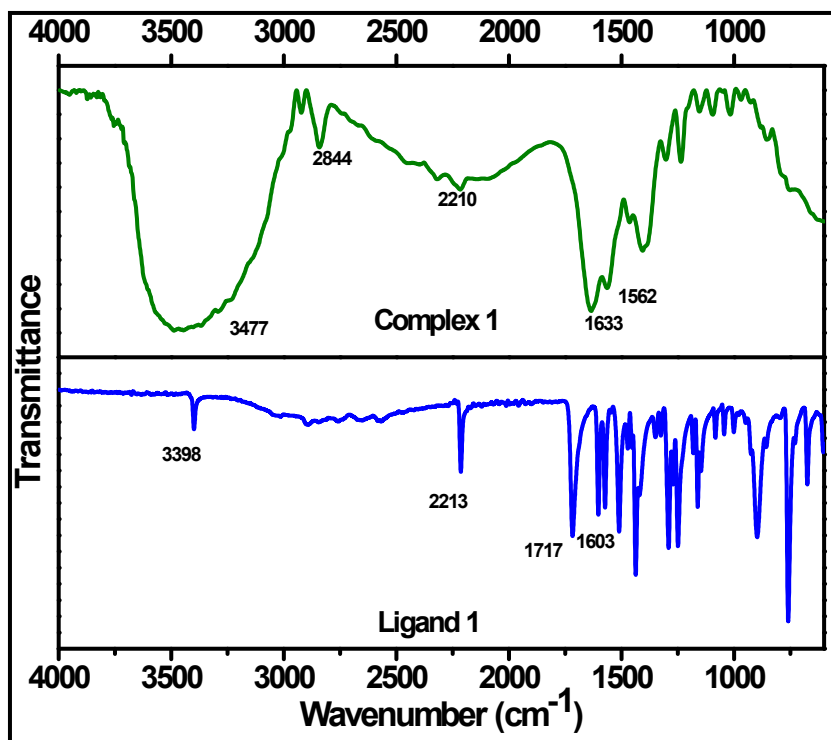

92

93 **Figure S1. IR spectra of 1.**

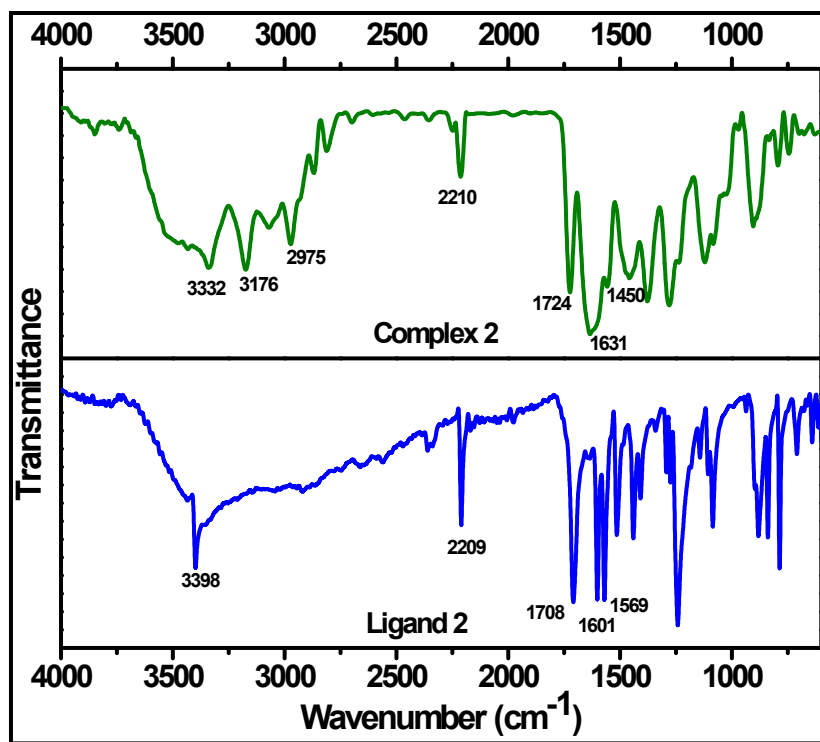

94

95 **Figure S2.** IR spectra of 2.

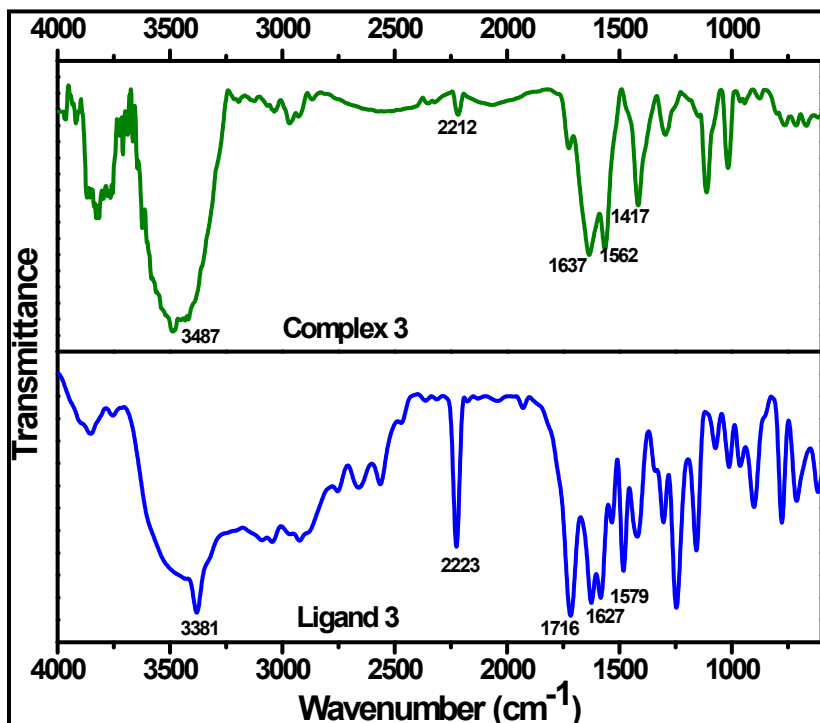

96

97 **Figure S3.** IR spectra of 3.

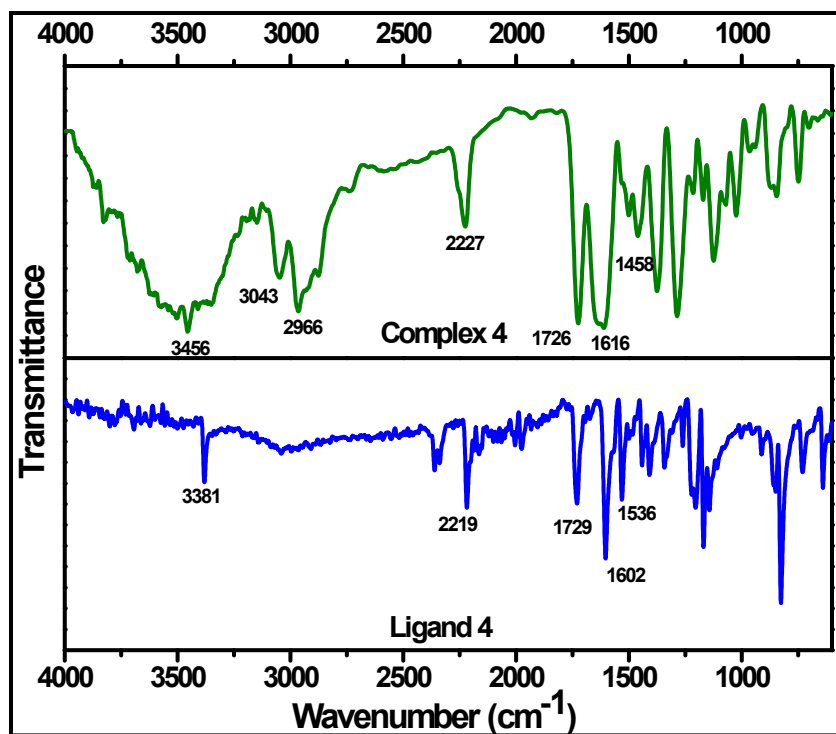

98

99 **Figure S4.** IR spectra of 4.

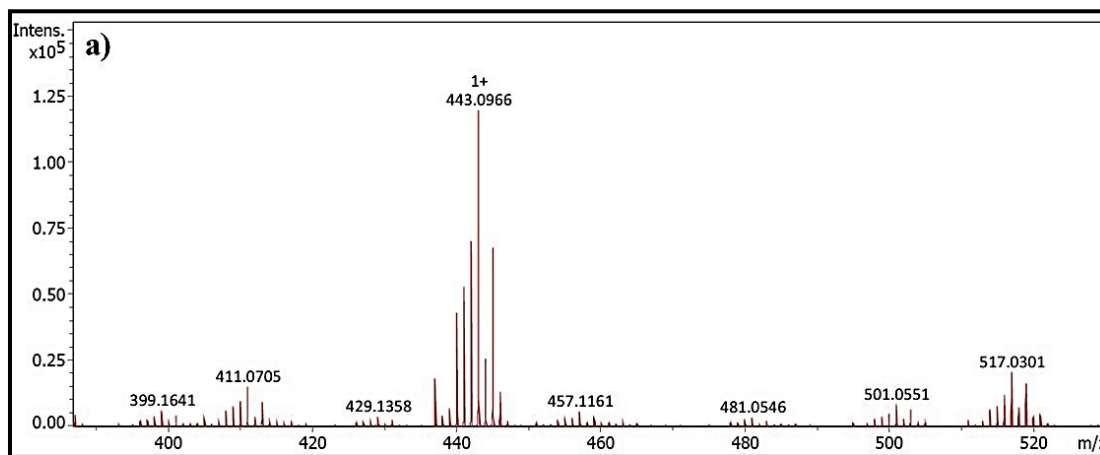

100

101

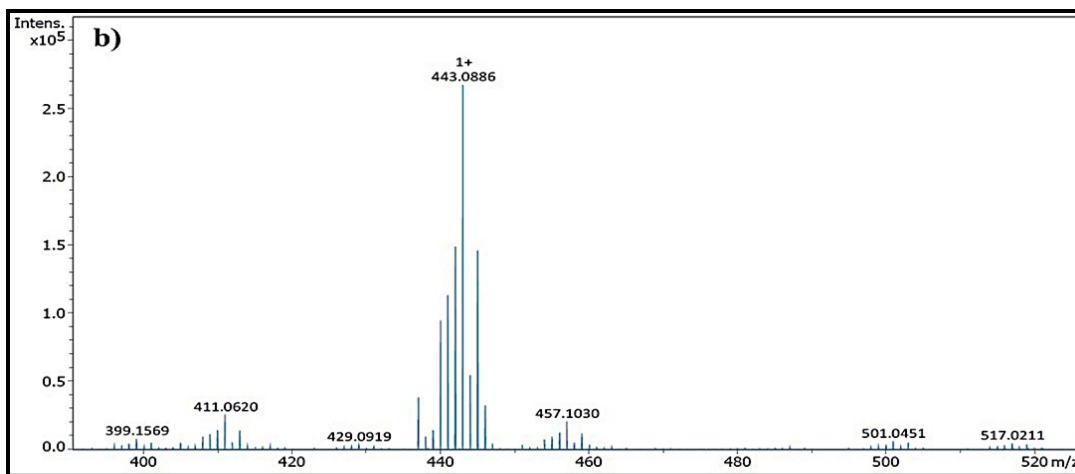

102 **Figure S5.** ESI-MS of **1** recorded after dissolving in a) MeOH, b) acetonitrile at room temperature.

103

104

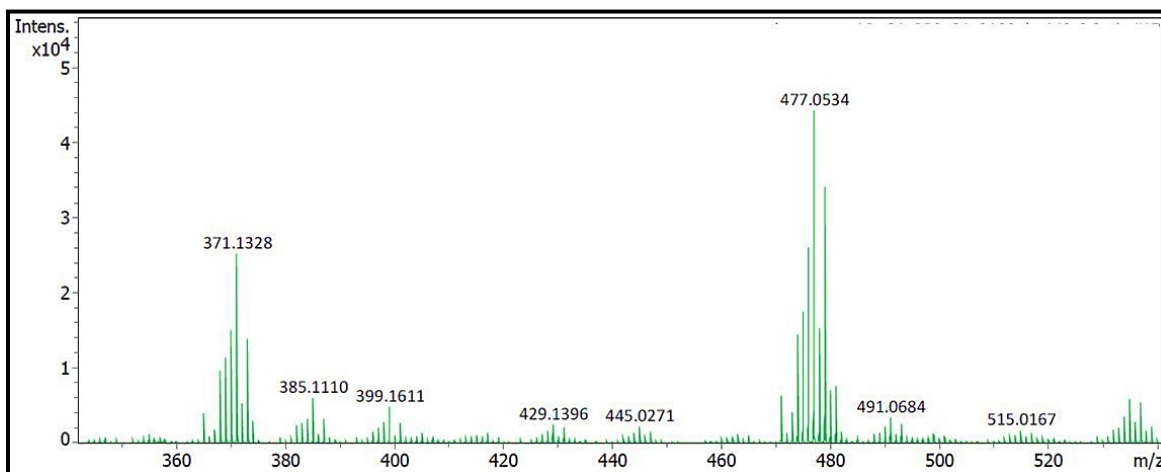

105 **Figure S6.** ESI-MS of **2** recorded after dissolving in MeOH at room temperature.

106

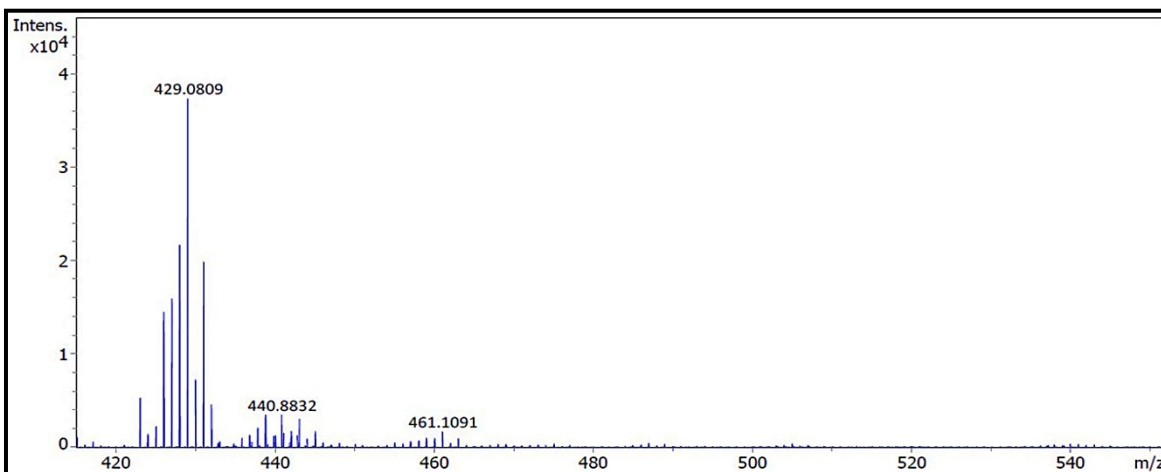



107 **Figure S7.** ESI-MS of **3** recorded after dissolving in MeOH at room temperature.

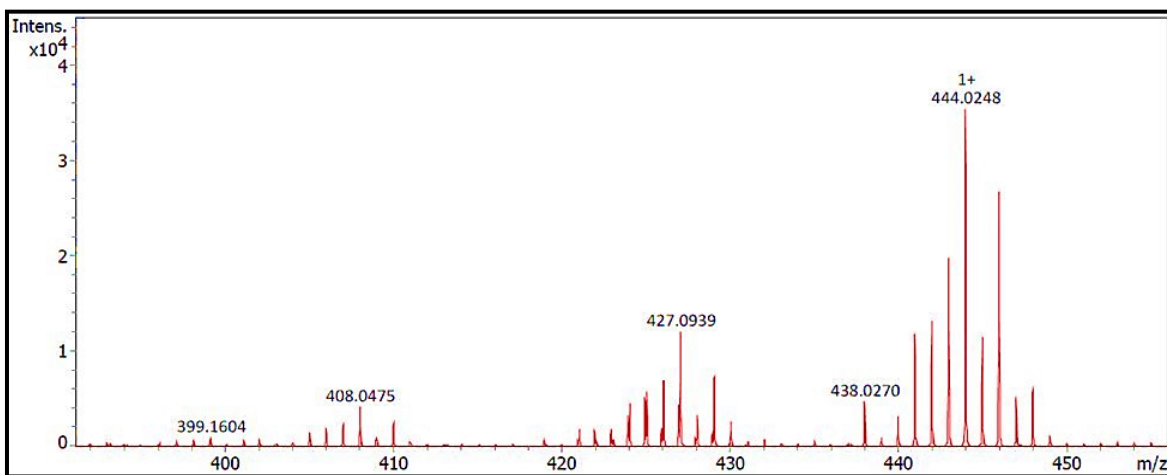

108

109 **Figure S8.** ESI-MS of **4** recorded after dissolving in MeOH at room temperature.

110

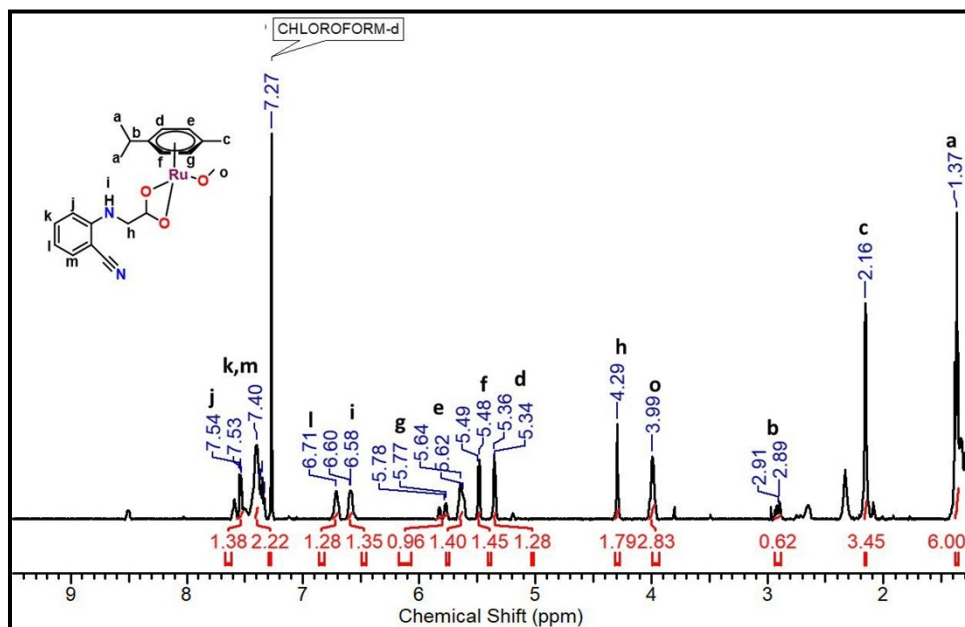

111

112 **Figure S9.** <sup>1</sup>H NMR of **1** in CDCl<sub>3</sub> at room temperature.

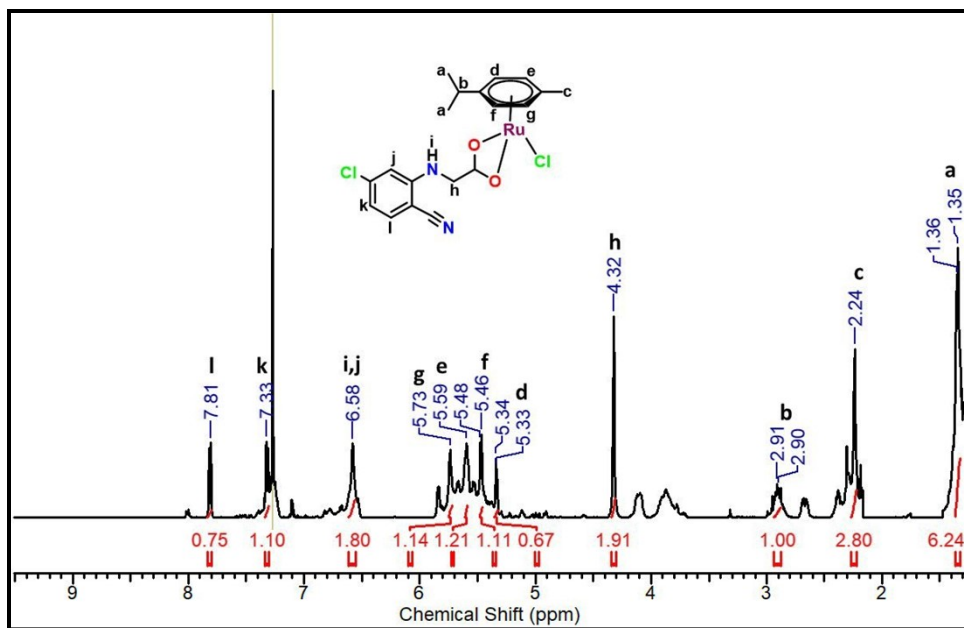

113

114 **Figure S10.**  $^1\text{H}$  NMR of **2** in  $\text{CDCl}_3$  at room temperature.

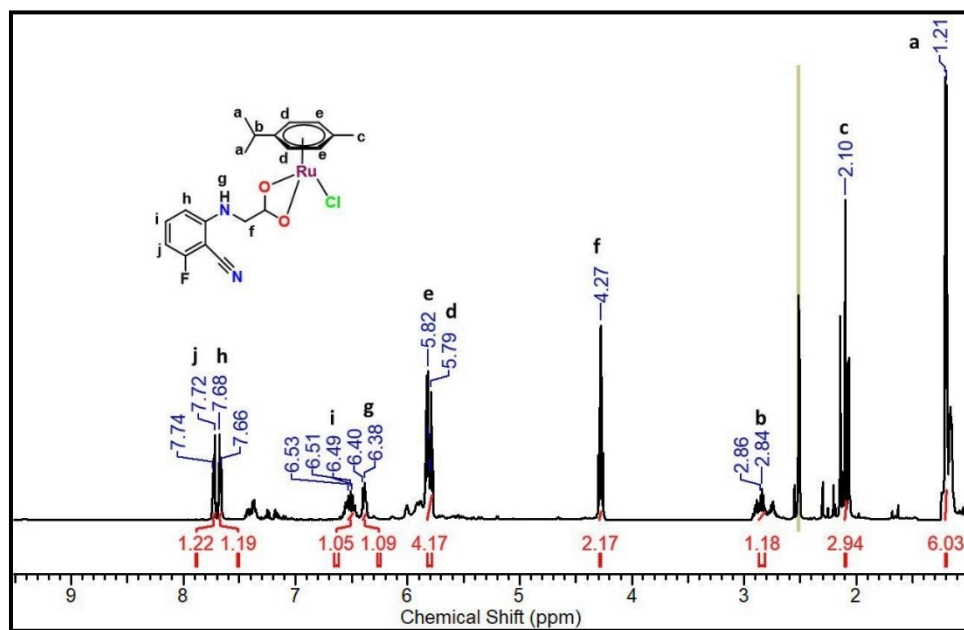

115

116 **Figure S11.**  $^1\text{H}$  NMR of **3** in  $\text{DMSO}-d_6$  at room temperature.

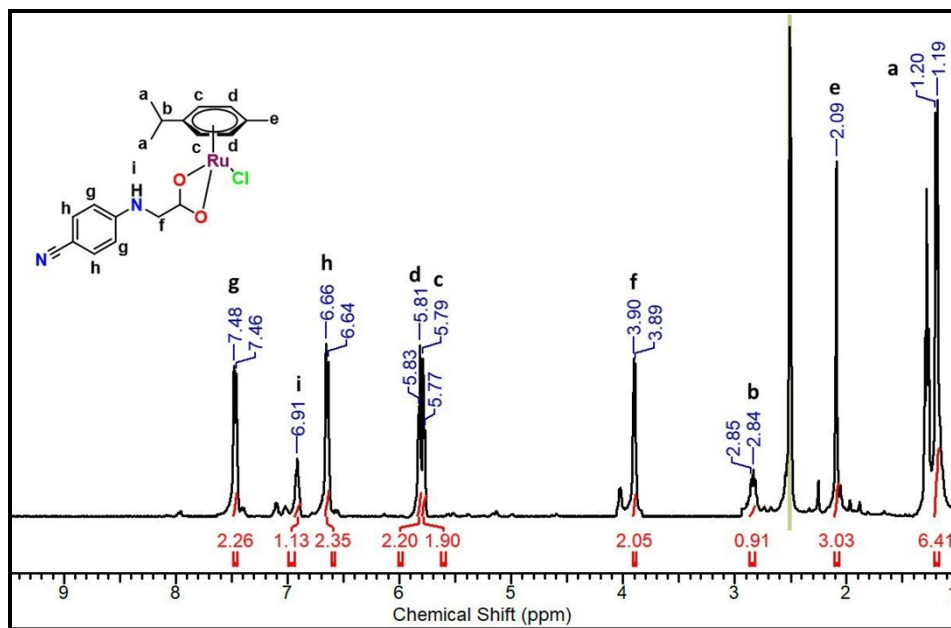

117

118 **Figure S12.**  $^1\text{H}$  NMR of **4** in  $\text{DMSO-}d_6$  at room temperature.

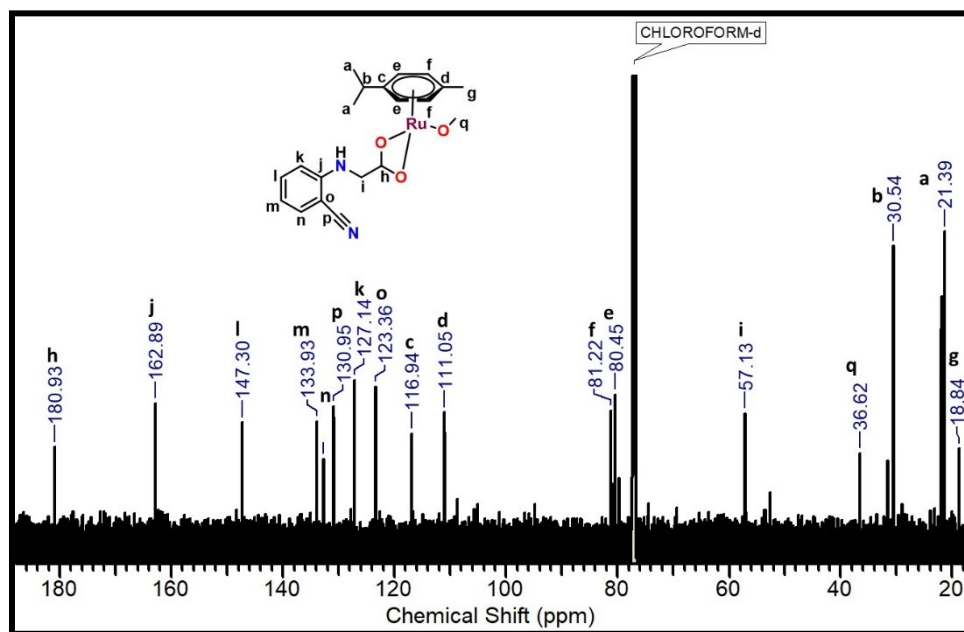

119

120 **Figure S13.**  $^{13}\text{C}$  NMR of **1** in  $\text{CDCl}_3$  at room temperature.

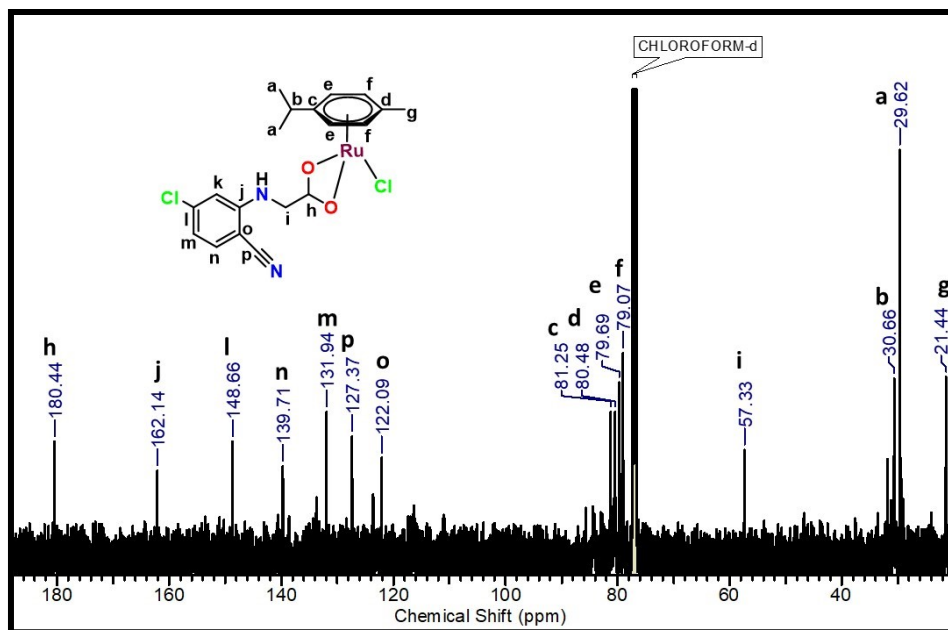

121

122 **Figure S14.**  $^{13}\text{C}$  NMR of **2** in  $\text{CDCl}_3$  at room temperature.

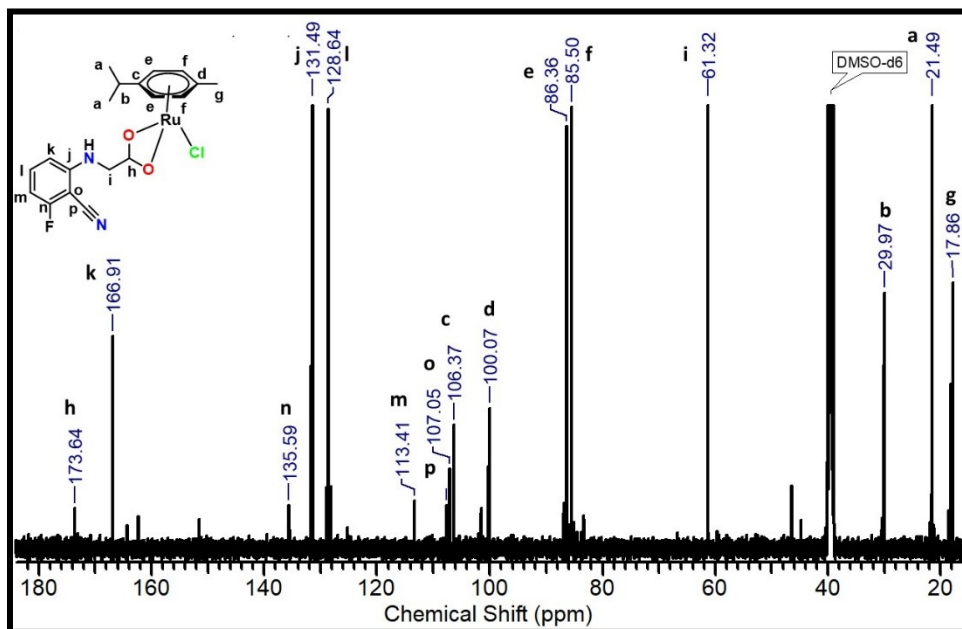

123

124 **Figure S15.**  $^{13}\text{C}$  NMR of **3** in  $\text{DMSO-}d_6$  at room temperature.

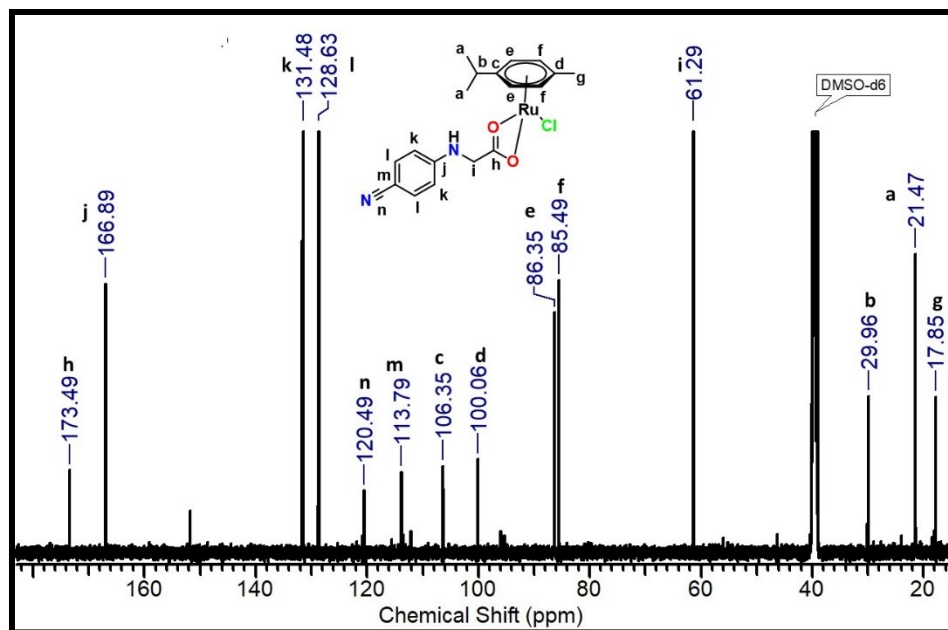

125

126 **Figure S16.**  $^{13}\text{C}$  NMR of **4** in  $\text{DMSO-}d_6$  at room temperature.

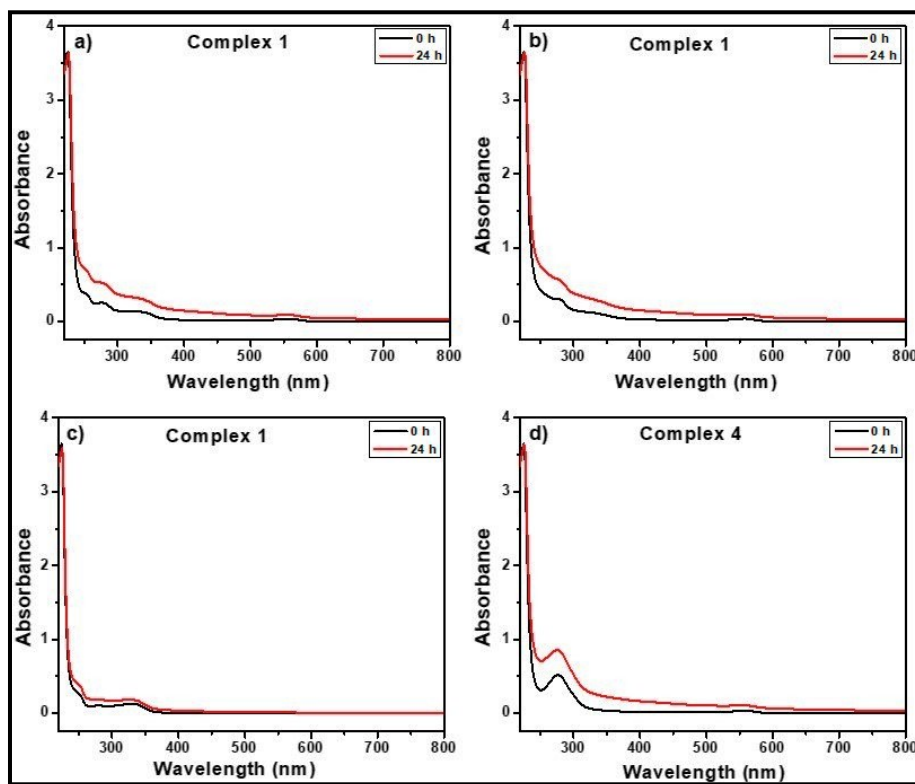

127

128 **Figure S17.** Stability of **1**, **2**, **3** and **4** in  $\text{DMSO-}d_6$  at room temperature at 0h and 24 h.

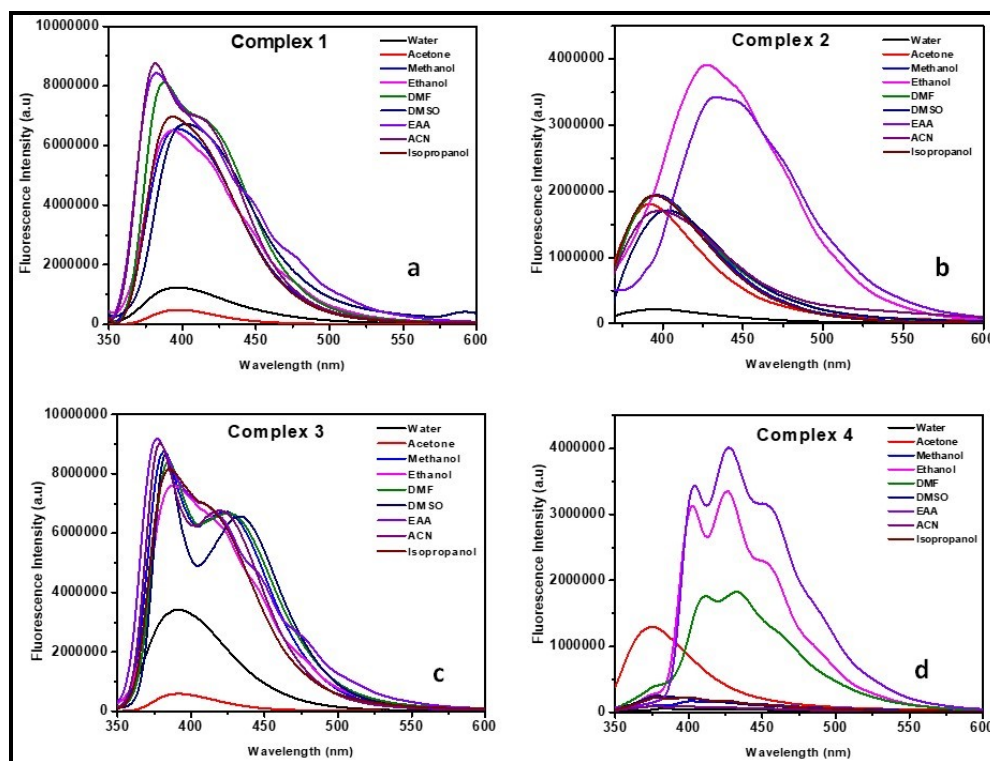

129

130 **Figure S18.** Effect of solvents on the fluorescence of **1**, **2**, **3** and **4** in DMSO- $d_6$  at room  
131 temperature

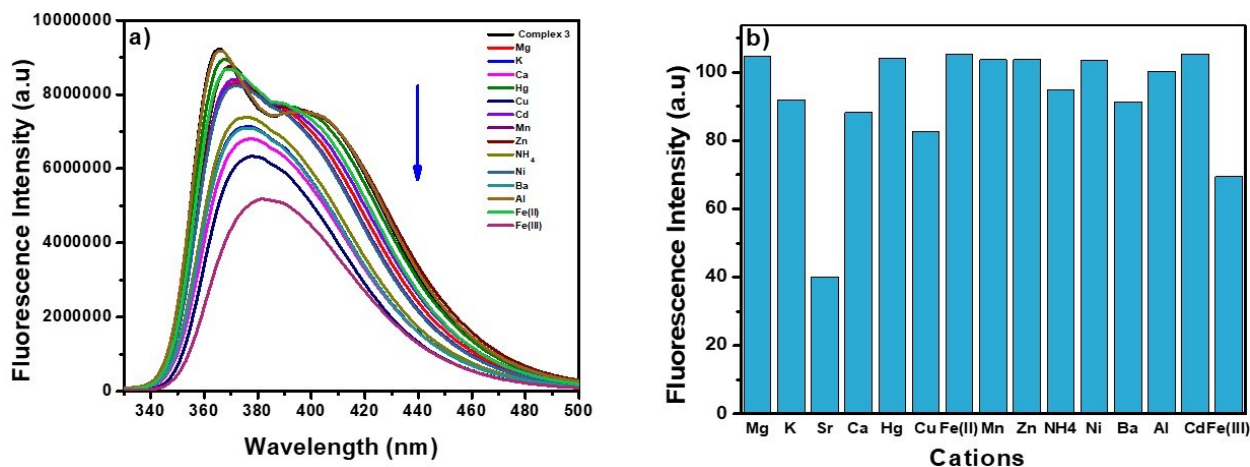

132

133 **Figure S19.** Effect of cations on the fluorescence of **3** in DMSO- $d_6$  at room temperature.

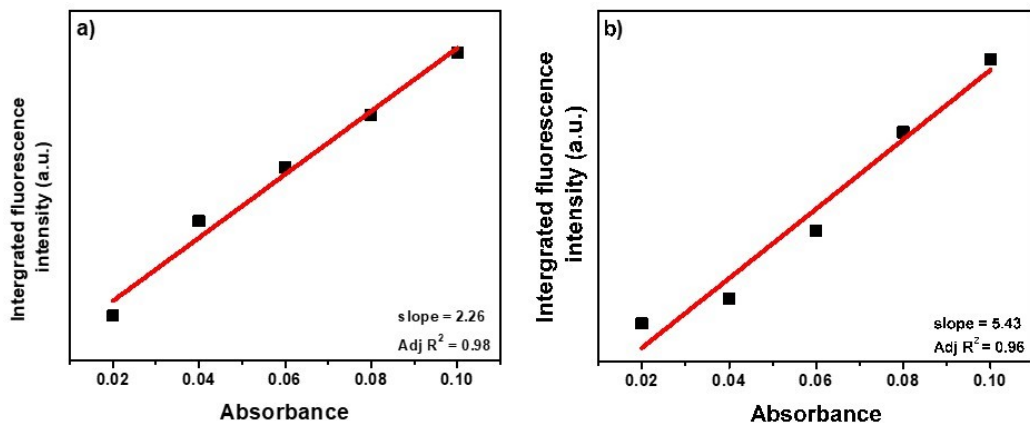

134

135 **Figure S20.** Quantum Yield of **3** with respect to 2 amino pyridine.

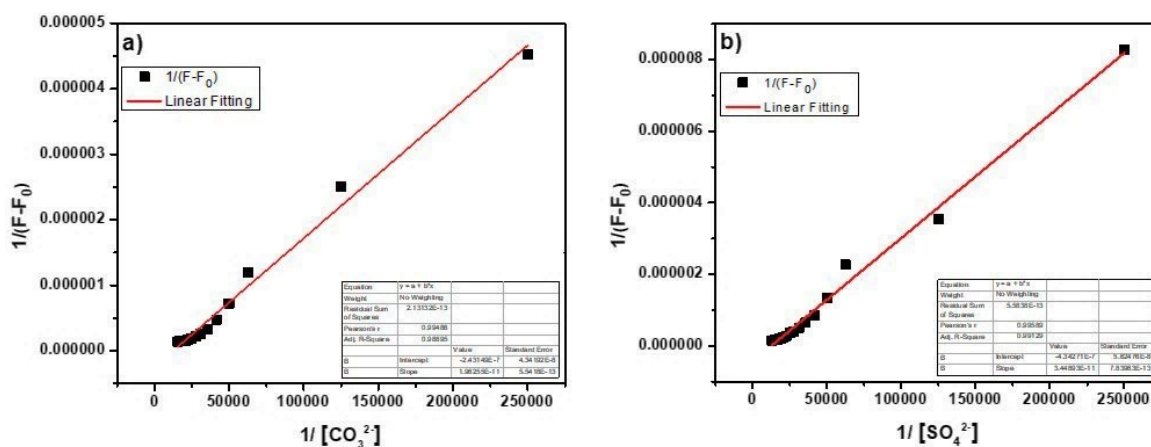

136

137 **Figure S21.** B-H plot of **3** obtained by titration with  $\text{CO}_3^{2-}$  and  $\text{SO}_4^{2-}$  anions.

138 **Table S1.** Quantum yield ( $\Phi$ ) of **3**, **3** +  $\text{CO}_3^{2-}$  and **3** +  $\text{SO}_4^{2-}$  anions in DMSO in comparison with  
 139 the reference taken as Amino pyridine ( $\int_S$  represents the area integral of sample and reference).

| Complexes                         | $\lambda_{\text{max}}$ (nm) | Abs (a.u.) | $\int$ Area | $\Phi$ values |
|-----------------------------------|-----------------------------|------------|-------------|---------------|
| <b>3</b>                          | 380                         | 0.10       | 227315719   | 0.468         |
| <b>3</b> + $\text{CO}_3^{2-}$     | 380                         | 0.099      | 65364296    | 0.134         |
| <b>3</b> + $\text{SO}_4^{2-}$     | 380                         | 0.098      | 62404914    | 0.128         |
| <b>Amino pyridine (reference)</b> | -                           | 0.10       | 313005188.6 | 0.60          |

140

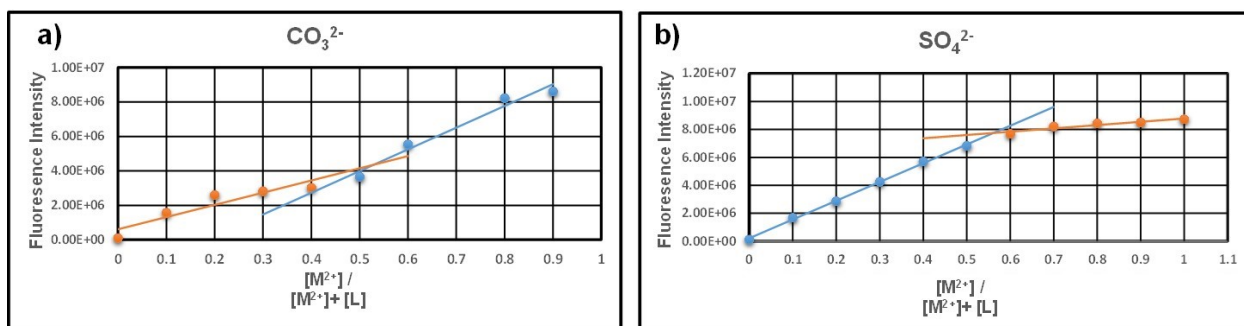

141

142 **Figure S22.** JOB's plot of **3** on serial dilution with  $\text{CO}_3^{2-}$  and  $\text{SO}_4^{2-}$  anions.

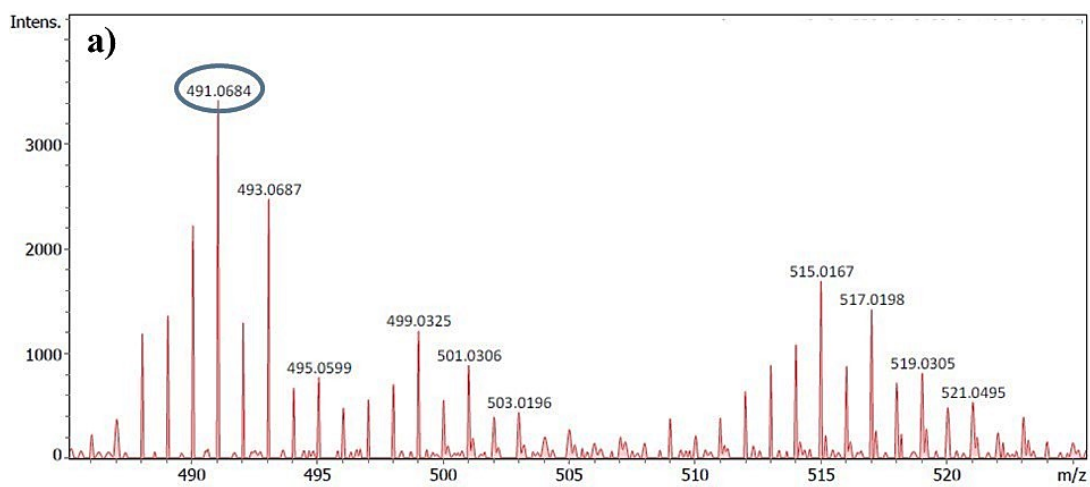

143

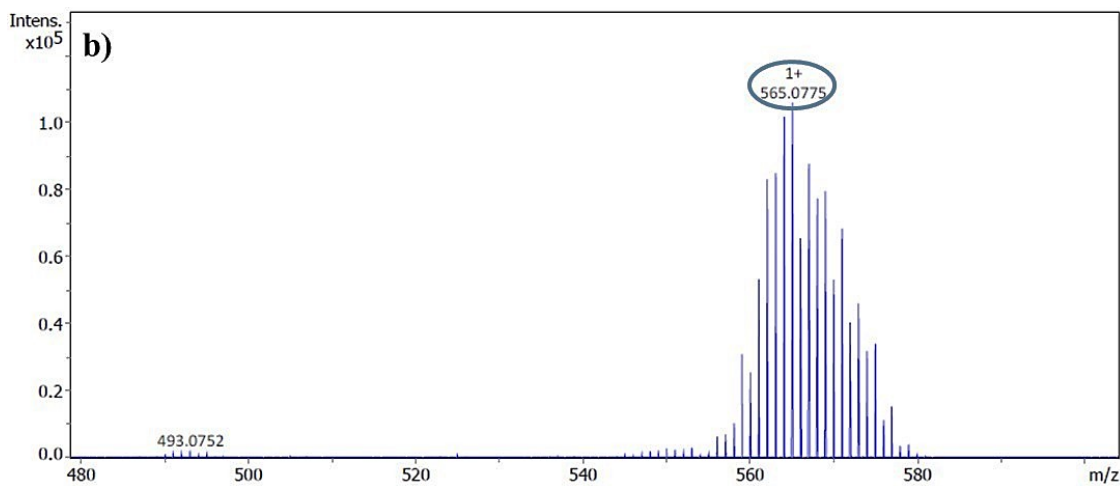

144

145 **Figure S23.** ESI spectra for the probable interaction of **3** with a)  $\text{CO}_3^{2-}$ , b)  $\text{SO}_4^{2-}$  anions,  
146 respectively.

### 147 Calculations of the interaction energies of the individual interactions

148 Interaction energies of the interactions “ $\text{NH}\cdots\text{O}(3) + \text{CH}\cdots\text{O}(4)$ ”, “ $\text{O}(1)\cdots\text{Na}(1) + \text{Cl}\cdots\text{Na}(1)$ ”  
149 and “ $\text{O}(3)\cdots\text{Na}(1) + \text{O}(5)\cdots\text{Na}(1)$ ” in  $\mathbf{3}\cdot\text{Na}_2\text{CO}_3$  were calculated using the equations S1–S3:



150

$$151 \quad E_{\text{int}}[\text{NH}\cdots\text{O}(3) + \text{CH}\cdots\text{O}(4)] = [E_{\text{int}}(\mathbf{3}\cdots\text{Na}_2\text{CO}_3) + E_{\text{int}}(\text{Na}(2)\text{CO}_3^-\cdots\mathbf{3}\cdot\text{Na}(1)^+) -$$
$$152 \quad E_{\text{int}}(\text{Na}(1)^+\cdots\mathbf{3}\cdot\text{Na}(2)\text{CO}_3^-)]/2 \quad (\text{S1})$$

153

$$154 \quad E_{\text{int}}[\text{O}(1)\cdots\text{Na}(1) + \text{Cl}\cdots\text{Na}(1)] = [E_{\text{int}}(\mathbf{3}\cdots\text{Na}_2\text{CO}_3) + E_{\text{int}}(\text{Na}(1)^+\cdots\mathbf{3}\cdot\text{Na}(2)\text{CO}_3^-) - E_{\text{int}}(\text{Na}(2)\text{CO}_3^-$$
$$155 \quad \cdots\mathbf{3}\cdot\text{Na}(1)^+)]/2 \quad (\text{S2})$$

156

$$157 \quad E_{\text{int}}[\text{O}(3)\cdots\text{Na}(1) + \text{O}(5)\cdots\text{Na}(1)] = [E_{\text{int}}(\text{Na}(1)^+\cdots\mathbf{3}\cdot\text{Na}(2)\text{CO}_3^-) + E_{\text{int}}(\text{Na}(2)\text{CO}_3^-\cdots\mathbf{3}\cdot\text{Na}(1)^+) -$$
$$158 \quad E_{\text{int}}(\mathbf{3}\cdots\text{Na}_2\text{CO}_3)]/2 \quad (\text{S3})$$

159

160 where  $E_{\text{int}}(\mathbf{3}\cdots\text{Na}_2\text{CO}_3) = E(\mathbf{3}\cdot\text{Na}_2\text{CO}_3) - E\{\mathbf{3}\} - E\{\text{Na}_2\text{CO}_3\} + \text{BSSE}$

161  $E_{\text{int}}(\text{Na}(2)\text{CO}_3^-\cdots\mathbf{3}\cdot\text{Na}(1)^+) = E(\mathbf{3}\cdot\text{Na}_2\text{CO}_3) - E\{\text{Na}(2)\text{CO}_3^-\} - E\{\mathbf{3}\cdot\text{Na}(1)^+\} + \text{BSSE}$

162  $E_{\text{int}}(\text{Na}(1)^+\cdots\mathbf{3}\cdot\text{Na}(2)\text{CO}_3^-) = E(\mathbf{3}\cdot\text{Na}_2\text{CO}_3) - E\{\text{Na}(1)^+\} - E\{\mathbf{3}\cdot\text{Na}(2)\text{CO}_3^-\} + \text{BSSE}.$

163  $E(\mathbf{3}\cdot\text{Na}_2\text{CO}_3)$  is total energy of the adduct  $\mathbf{3}\cdot\text{Na}_2\text{CO}_3$  and  $E\{\mathbf{3}\}$ ,  $E\{\text{Na}_2\text{CO}_3\}$ ,  $E\{\text{Na}(2)\text{CO}_3^-\} -$

164  $E\{\mathbf{3}\cdot\text{Na}(1)^+\}$ ,  $E\{\text{Na}(1)^+\} - E\{\mathbf{3}\cdot\text{Na}(2)\text{CO}_3^-\}$  are total energies of the fragments with unrelaxed  
165 geometries corresponding to those in  $\mathbf{3}\cdot\text{Na}_2\text{CO}_3$ .

166 **Table S2.** Cartesian atomic coordinates of the equilibrium structures (nuclear charges of elements  
167 are indicated in the first column).

168 **1** (gas)

|    |           |           |           |
|----|-----------|-----------|-----------|
| 44 | -1.553492 | -0.409645 | -0.120527 |
| 8  | -0.140254 | -0.037783 | -1.681081 |
| 8  | 0.227193  | 0.694206  | 0.328950  |
| 8  | -0.287658 | -2.114213 | 0.353171  |
| 6  | 0.642676  | 0.533273  | -0.861659 |
| 6  | 2.016067  | 0.969815  | -1.277808 |
| 7  | 2.810375  | 1.410503  | -0.140258 |
| 6  | 0.194681  | -2.964945 | -0.696909 |
| 6  | -2.980390 | 1.215089  | 0.139012  |
| 6  | -3.217429 | 0.540015  | -1.083639 |
| 1  | -3.136692 | 1.098743  | -2.016544 |
| 6  | -3.414913 | -0.872197 | -1.132986 |
| 1  | -3.497252 | -1.369634 | -2.098497 |
| 6  | -3.371181 | -1.650659 | 0.045515  |
| 6  | -3.114604 | -0.980445 | 1.281503  |
| 1  | -2.954868 | -1.571675 | 2.182282  |
| 6  | -2.928625 | 0.416559  | 1.326247  |
| 1  | -2.621028 | 0.874060  | 2.264991  |

|   |           |           |           |
|---|-----------|-----------|-----------|
| 6 | -3.480853 | -3.138817 | 0.003273  |
| 1 | -4.491451 | -3.441164 | 0.310001  |
| 1 | -2.773392 | -3.613628 | 0.693416  |
| 1 | -3.311444 | -3.531924 | -1.005528 |
| 6 | -2.729175 | 2.702375  | 0.138100  |
| 1 | -2.185701 | 2.928281  | -0.795650 |
| 6 | -4.082964 | 3.416870  | 0.095007  |
| 1 | -4.677115 | 3.129926  | -0.782355 |
| 1 | -3.937362 | 4.503475  | 0.063820  |
| 1 | -4.671955 | 3.184784  | 0.994071  |
| 6 | -1.892941 | 3.190803  | 1.312651  |
| 1 | -2.446914 | 3.119911  | 2.259720  |
| 1 | -1.646206 | 4.249806  | 1.172758  |
| 1 | -0.951694 | 2.635010  | 1.410120  |
| 1 | 0.488155  | -1.893258 | 0.927844  |
| 1 | 0.568830  | -3.895933 | -0.257698 |
| 1 | 0.989381  | -2.473516 | -1.270280 |
| 1 | -0.648037 | -3.177810 | -1.360773 |
| 1 | 2.480084  | 0.114897  | -1.798730 |
| 1 | 1.900928  | 1.759504  | -2.038012 |
| 1 | 2.274189  | 1.311763  | 0.719976  |
| 6 | 6.708605  | -0.189581 | 0.202433  |
| 6 | 5.646546  | -0.858430 | 0.791847  |
| 6 | 6.475930  | 0.980378  | -0.521004 |
| 6 | 4.350643  | -0.343654 | 0.655895  |
| 6 | 5.191804  | 1.506417  | -0.633064 |
| 6 | 4.111968  | 0.865630  | -0.034354 |
| 1 | 7.717793  | -0.582514 | 0.300404  |
| 1 | 5.804745  | -1.783789 | 1.342222  |
| 6 | 3.214544  | -1.065765 | 1.124913  |
| 1 | 5.010648  | 2.440332  | -1.162375 |
| 1 | 7.309668  | 1.499998  | -0.989341 |
| 7 | 2.235878  | -1.619835 | 1.422996  |

169 2 (gas)

|    |           |           |          |
|----|-----------|-----------|----------|
| 44 | 0.912073  | -0.017152 | 1.973366 |
| 17 | -0.649064 | 0.804796  | 3.569575 |
| 8  | -0.609417 | -1.522770 | 1.511074 |
| 8  | -0.655545 | 0.418536  | 0.511881 |
| 6  | 2.476230  | 1.360730  | 1.447354 |
| 6  | 2.555606  | 0.212974  | 0.585325 |
| 6  | 2.594593  | -1.092825 | 1.104504 |
| 6  | 2.537761  | -1.313615 | 2.521029 |
| 6  | 2.523023  | -0.187476 | 3.377461 |
| 6  | 2.493410  | 1.136838  | 2.842610 |
| 6  | 2.386029  | -2.708551 | 3.059021 |

|    |           |           |           |
|----|-----------|-----------|-----------|
| 1  | 1.706963  | -3.290587 | 2.429969  |
| 1  | 3.359751  | -3.209886 | 3.077046  |
| 1  | 1.982565  | -2.691767 | 4.073801  |
| 6  | 2.293079  | 2.733208  | 0.834390  |
| 6  | 1.531539  | 3.701818  | 1.738939  |
| 6  | 3.666185  | 3.292374  | 0.437650  |
| 1  | 4.196821  | 2.620254  | -0.245359 |
| 1  | 3.550949  | 4.260907  | -0.058773 |
| 1  | 4.291750  | 3.437342  | 1.326014  |
| 6  | -1.202063 | -0.689329 | 0.767528  |
| 6  | -2.576078 | -0.998899 | 0.223665  |
| 7  | -2.862693 | -2.399857 | 0.395505  |
| 1  | -3.285257 | -0.355903 | 0.768542  |
| 1  | -2.604364 | -0.706179 | -0.832920 |
| 1  | 2.373612  | -0.328978 | 4.442730  |
| 1  | 2.307965  | 1.961757  | 3.521741  |
| 1  | 2.511577  | -1.941661 | 0.432543  |
| 1  | 2.440449  | 0.355907  | -0.485655 |
| 1  | 1.698568  | 2.584624  | -0.077089 |
| 1  | 2.134062  | 4.000366  | 2.604695  |
| 1  | 1.295030  | 4.612469  | 1.180617  |
| 1  | 0.594777  | 3.262286  | 2.098473  |
| 1  | -2.230442 | -2.901833 | 1.012314  |
| 6  | -6.523835 | -4.179587 | -0.642194 |
| 6  | -6.262857 | -2.837252 | -0.916205 |
| 6  | -5.533311 | -4.913303 | -0.005237 |
| 6  | -5.067944 | -2.220451 | -0.578820 |
| 6  | -4.316081 | -4.326817 | 0.346822  |
| 6  | -4.058537 | -2.958946 | 0.066927  |
| 1  | -7.470995 | -4.626526 | -0.919267 |
| 17 | -7.489506 | -1.887424 | -1.710581 |
| 1  | -4.923865 | -1.172086 | -0.811625 |
| 6  | -3.293871 | -5.095751 | 0.991284  |
| 1  | -5.694327 | -5.961480 | 0.226809  |
| 7  | -2.433546 | -5.675275 | 1.509180  |

170 3 (gas)

|    |          |           |           |
|----|----------|-----------|-----------|
| 44 | 3.134985 | 0.815431  | -0.469155 |
| 17 | 3.013781 | -0.266536 | -2.586096 |
| 8  | 1.003723 | 0.361845  | -0.304101 |
| 8  | 2.479105 | -1.114394 | 0.336326  |
| 6  | 5.212264 | 1.114969  | 0.053141  |
| 6  | 4.381975 | 1.314305  | 1.207163  |
| 6  | 3.292984 | 2.209075  | 1.201030  |
| 6  | 2.946838 | 2.899305  | -0.002292 |
| 6  | 3.781526 | 2.746022  | -1.142173 |

|   |           |           |           |
|---|-----------|-----------|-----------|
| 6 | 4.899899  | 1.864694  | -1.104770 |
| 6 | 1.664908  | 3.678469  | -0.084036 |
| 1 | 0.875541  | 3.181854  | 0.485698  |
| 1 | 1.814140  | 4.683680  | 0.324736  |
| 1 | 1.330944  | 3.768733  | -1.120064 |
| 6 | 6.314323  | 0.077663  | 0.102882  |
| 6 | 6.662699  | -0.502919 | -1.267338 |
| 6 | 7.548533  | 0.687950  | 0.781469  |
| 1 | 7.317345  | 1.069692  | 1.781685  |
| 1 | 8.337263  | -0.064814 | 0.877704  |
| 1 | 7.941972  | 1.517983  | 0.183295  |
| 6 | 1.282420  | -0.810915 | 0.079628  |
| 6 | 0.194674  | -1.852218 | 0.188550  |
| 7 | -1.095646 | -1.217677 | 0.107241  |
| 1 | 0.360139  | -2.571527 | -0.628695 |
| 1 | 0.323598  | -2.389083 | 1.136214  |
| 1 | 3.483220  | 3.186277  | -2.087535 |
| 1 | 5.405480  | 1.638995  | -2.037624 |
| 1 | 2.621761  | 2.250294  | 2.052872  |
| 1 | 4.527526  | 0.666245  | 2.067813  |
| 1 | 5.938446  | -0.739933 | 0.732744  |
| 1 | 7.163658  | 0.240228  | -1.899174 |
| 1 | 7.356327  | -1.339899 | -1.142880 |
| 1 | 5.770732  | -0.863797 | -1.790366 |
| 1 | -1.085296 | -0.249705 | -0.201470 |
| 6 | -4.736751 | -3.319237 | 0.048651  |
| 6 | -3.524096 | -3.984184 | 0.240274  |
| 6 | -4.684515 | -1.949916 | -0.124925 |
| 6 | -2.309037 | -3.312694 | 0.257011  |
| 6 | -3.490897 | -1.229579 | -0.114352 |
| 6 | -2.262542 | -1.916144 | 0.077939  |
| 1 | -5.690696 | -3.831958 | 0.031376  |
| 1 | -3.529474 | -5.061546 | 0.377277  |
| 1 | -1.389728 | -3.867705 | 0.403737  |
| 6 | -3.485201 | 0.188810  | -0.286734 |
| 9 | -5.821998 | -1.266207 | -0.310483 |
| 7 | -3.399134 | 1.337289  | -0.416026 |

171 4 (gas)

|    |          |           |           |
|----|----------|-----------|-----------|
| 44 | 3.719819 | 0.413234  | 0.146439  |
| 17 | 3.023039 | 0.319272  | 2.420852  |
| 8  | 2.066928 | -0.985648 | -0.220367 |
| 8  | 1.715746 | 1.168534  | -0.241774 |
| 6  | 4.831967 | 2.081362  | -0.596257 |
| 6  | 4.616212 | 1.168616  | -1.683254 |
| 6  | 4.926062 | -0.196338 | -1.547088 |

|   |           |           |           |
|---|-----------|-----------|-----------|
| 6 | 5.504455  | -0.710206 | -0.336751 |
| 6 | 5.784695  | 0.204439  | 0.701151  |
| 6 | 5.451719  | 1.587934  | 0.577746  |
| 6 | 5.700480  | -2.189315 | -0.156444 |
| 1 | 4.884644  | -2.746073 | -0.625477 |
| 1 | 6.643299  | -2.502330 | -0.618166 |
| 1 | 5.728059  | -2.449553 | 0.904118  |
| 6 | 4.316231  | 3.500770  | -0.703595 |
| 6 | 3.813149  | 4.060624  | 0.627977  |
| 6 | 5.413662  | 4.385194  | -1.310932 |
| 1 | 5.750859  | 4.006045  | -2.281469 |
| 1 | 5.041636  | 5.404615  | -1.452859 |
| 1 | 6.281485  | 4.430026  | -0.642724 |
| 6 | 1.261489  | -0.010655 | -0.245273 |
| 6 | -0.229996 | -0.237869 | -0.228716 |
| 7 | -0.522662 | -1.637204 | -0.399902 |
| 1 | -0.598448 | 0.157818  | 0.731324  |
| 1 | -0.675788 | 0.368759  | -1.026631 |
| 1 | 6.101627  | -0.172347 | 1.668464  |
| 1 | 5.528452  | 2.219498  | 1.455623  |
| 1 | 4.605096  | -0.895252 | -2.314147 |
| 1 | 4.063534  | 1.507259  | -2.554637 |
| 1 | 3.466258  | 3.467478  | -1.397224 |
| 1 | 4.638972  | 4.251441  | 1.322640  |
| 1 | 3.310946  | 5.016684  | 0.452903  |
| 1 | 3.102810  | 3.377815  | 1.105974  |
| 1 | 0.263456  | -2.252015 | -0.222200 |
| 6 | -4.367681 | -3.239644 | 0.007626  |
| 6 | -4.187177 | -1.854163 | -0.049292 |
| 6 | -3.243627 | -4.078877 | -0.061345 |
| 6 | -2.916997 | -1.309361 | -0.172895 |
| 6 | -1.977385 | -3.542722 | -0.186490 |
| 6 | -1.786639 | -2.145525 | -0.245983 |
| 6 | -5.683837 | -3.797800 | 0.135952  |
| 1 | -5.051639 | -1.199729 | 0.007824  |
| 1 | -2.804192 | -0.231415 | -0.213115 |
| 1 | -1.112737 | -4.198753 | -0.242455 |
| 1 | -3.375971 | -5.155356 | -0.013732 |
| 7 | -6.746037 | -4.250300 | 0.238133  |

172 3 (SMD)

|    |          |           |           |
|----|----------|-----------|-----------|
| 44 | 3.112799 | 0.844568  | -0.465605 |
| 17 | 2.834906 | -0.174436 | -2.677818 |
| 8  | 0.960278 | 0.393218  | -0.230962 |
| 8  | 2.448429 | -1.114951 | 0.298258  |
| 6  | 5.218413 | 1.087985  | 0.045169  |

|   |           |           |           |
|---|-----------|-----------|-----------|
| 6 | 4.400542  | 1.275414  | 1.207088  |
| 6 | 3.332697  | 2.193418  | 1.223692  |
| 6 | 3.013219  | 2.942357  | 0.049101  |
| 6 | 3.825174  | 2.780478  | -1.101126 |
| 6 | 4.914430  | 1.864819  | -1.095296 |
| 6 | 1.783554  | 3.798444  | 0.003207  |
| 1 | 1.039478  | 3.451655  | 0.724198  |
| 1 | 2.053401  | 4.829860  | 0.257168  |
| 1 | 1.345009  | 3.794502  | -0.998074 |
| 6 | 6.319624  | 0.050619  | 0.075511  |
| 6 | 6.652939  | -0.530895 | -1.295983 |
| 6 | 7.560224  | 0.679782  | 0.722782  |
| 1 | 7.338919  | 1.070225  | 1.722137  |
| 1 | 8.354963  | -0.067847 | 0.816921  |
| 1 | 7.936735  | 1.504758  | 0.106179  |
| 6 | 1.242419  | -0.790224 | 0.114508  |
| 6 | 0.156617  | -1.825966 | 0.277807  |
| 7 | -1.142113 | -1.212401 | 0.128082  |
| 1 | 0.329609  | -2.603655 | -0.480350 |
| 1 | 0.268037  | -2.295025 | 1.262803  |
| 1 | 3.544896  | 3.273228  | -2.026733 |
| 1 | 5.425802  | 1.668064  | -2.031868 |
| 1 | 2.672028  | 2.238423  | 2.083846  |
| 1 | 4.541294  | 0.612225  | 2.056800  |
| 1 | 5.967519  | -0.761368 | 0.724589  |
| 1 | 7.118582  | 0.217956  | -1.947176 |
| 1 | 7.366040  | -1.353272 | -1.178834 |
| 1 | 5.760053  | -0.920525 | -1.797826 |
| 1 | -1.138575 | -0.247717 | -0.189911 |
| 6 | -4.739426 | -3.398247 | 0.006330  |
| 6 | -3.516776 | -4.019714 | 0.290432  |
| 6 | -4.704770 | -2.043549 | -0.233129 |
| 6 | -2.320764 | -3.319444 | 0.330860  |
| 6 | -3.528901 | -1.288889 | -0.203515 |
| 6 | -2.292489 | -1.929858 | 0.082168  |
| 1 | -5.677413 | -3.940615 | -0.027800 |
| 1 | -3.503889 | -5.088636 | 0.483789  |
| 1 | -1.398715 | -3.844520 | 0.553034  |
| 6 | -3.576157 | 0.111195  | -0.463813 |
| 9 | -5.846853 | -1.386554 | -0.513752 |
| 7 | -3.574075 | 1.252333  | -0.670719 |

173  $3\cdot\text{Na}_2\text{CO}_3$  (SMD)

|    |           |           |           |
|----|-----------|-----------|-----------|
| 44 | -1.909827 | -0.398340 | 0.198724  |
| 17 | -1.354441 | -2.728374 | -0.453765 |
| 8  | 0.205833  | -0.069835 | -0.299079 |

|   |           |           |           |
|---|-----------|-----------|-----------|
| 8 | -1.312535 | 0.185846  | -1.846800 |
| 6 | -3.959636 | 0.327028  | 0.294292  |
| 6 | -3.049705 | 1.399377  | 0.576844  |
| 6 | -2.055067 | 1.267413  | 1.562233  |
| 6 | -1.925392 | 0.056005  | 2.318557  |
| 6 | -2.838736 | -0.988168 | 2.058229  |
| 6 | -3.846241 | -0.855489 | 1.056892  |
| 6 | -0.779859 | -0.124692 | 3.268868  |
| 1 | 0.120954  | 0.366800  | 2.890231  |
| 1 | -1.033630 | 0.331295  | 4.232660  |
| 1 | -0.572084 | -1.185190 | 3.432201  |
| 6 | -4.949196 | 0.478047  | -0.839422 |
| 6 | -5.295917 | -0.837712 | -1.531888 |
| 6 | -6.207537 | 1.160967  | -0.287035 |
| 1 | -5.971760 | 2.127162  | 0.172104  |
| 1 | -6.926203 | 1.332397  | -1.095205 |
| 1 | -6.685190 | 0.526931  | 0.469429  |
| 6 | -0.102982 | 0.211215  | -1.505031 |
| 6 | 0.977494  | 0.568883  | -2.506413 |
| 7 | 2.315935  | 0.516183  | -1.976757 |
| 1 | 0.914380  | -0.152181 | -3.327676 |
| 1 | 0.742937  | 1.549082  | -2.934218 |
| 1 | -2.693739 | -1.950490 | 2.539345  |
| 1 | -4.443320 | -1.724946 | 0.803000  |
| 1 | -1.301364 | 2.042939  | 1.667600  |
| 1 | -3.050813 | 2.277521  | -0.063233 |
| 1 | -4.486310 | 1.149468  | -1.573191 |
| 1 | -5.880936 | -1.495444 | -0.879348 |
| 1 | -5.903286 | -0.630225 | -2.418708 |
| 1 | -4.397155 | -1.376091 | -1.853360 |
| 1 | 2.718316  | -0.434116 | -1.959870 |
| 6 | 4.179887  | 2.923545  | 0.952813  |
| 6 | 4.766132  | 1.758791  | 0.427609  |
| 6 | 2.928979  | 3.240000  | 0.491403  |
| 6 | 4.125334  | 0.987394  | -0.519053 |
| 6 | 2.222654  | 2.483186  | -0.463256 |
| 6 | 2.836876  | 1.325900  | -1.009389 |
| 1 | 4.670335  | 3.547866  | 1.691124  |
| 1 | 5.752986  | 1.461909  | 0.772196  |
| 1 | 4.603875  | 0.091231  | -0.909074 |
| 6 | 0.889612  | 2.911892  | -0.745183 |
| 9 | 2.302597  | 4.332331  | 0.978004  |
| 7 | -0.197443 | 3.278514  | -0.918712 |
| 8 | 3.007834  | -2.127140 | -1.437648 |
| 6 | 3.817272  | -2.295368 | -0.446429 |

|    |          |           |           |
|----|----------|-----------|-----------|
| 8  | 5.089664 | -2.280884 | -0.591804 |
| 8  | 3.311471 | -2.472757 | 0.751118  |
| 11 | 1.250361 | -2.126129 | -0.015447 |
| 11 | 5.341015 | -2.544012 | 1.583288  |

174

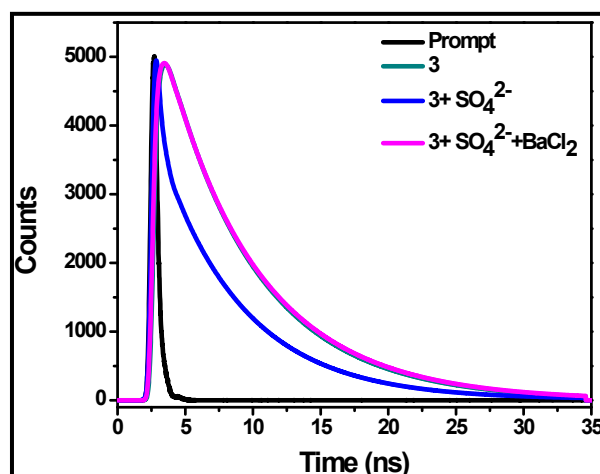

175

176 **Figure S24.** Fluorescence life time decay of **3** with  $4 \times 10^{-5}$  M resultant solution in DMSO on  
 177 addition of  $4 \times 10^{-4}$  M concentration of anions ( $\text{SO}_4^{2-}$ ), followed by further addition of  $4 \times 10^{-4}$  M  
 178 concentration of  $\text{BaCl}_2$ .

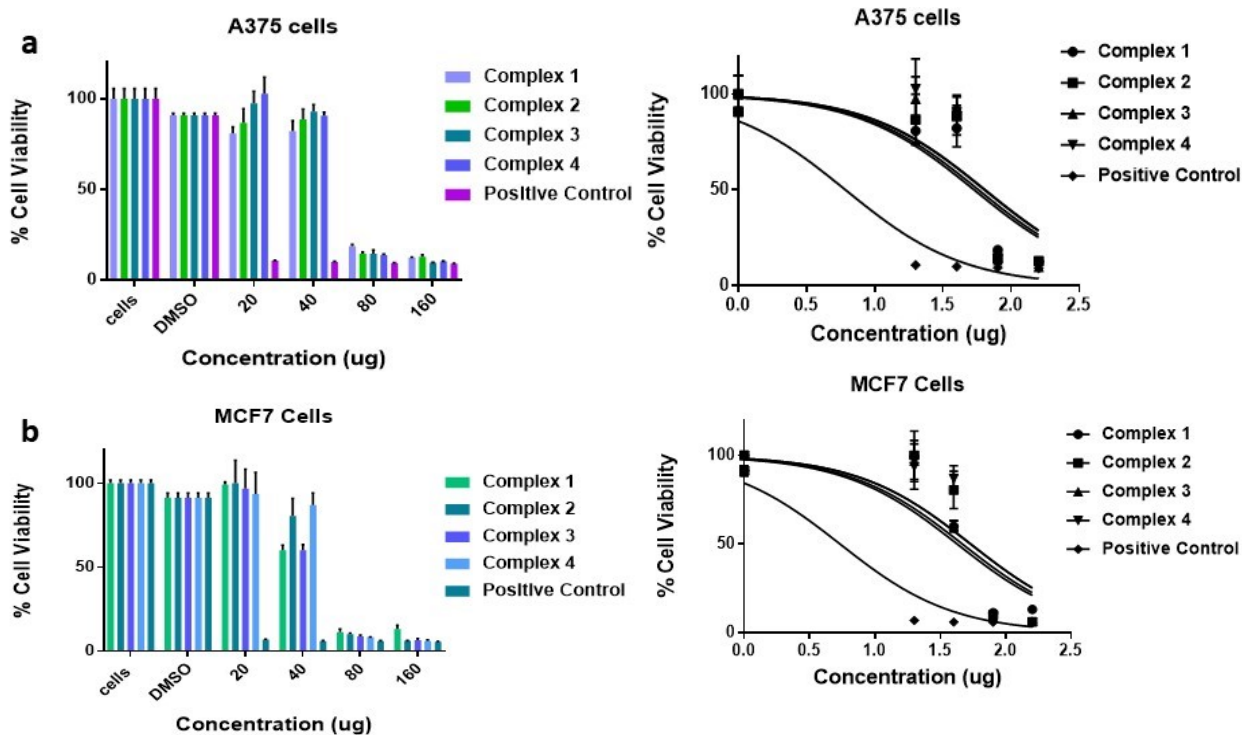

179

180



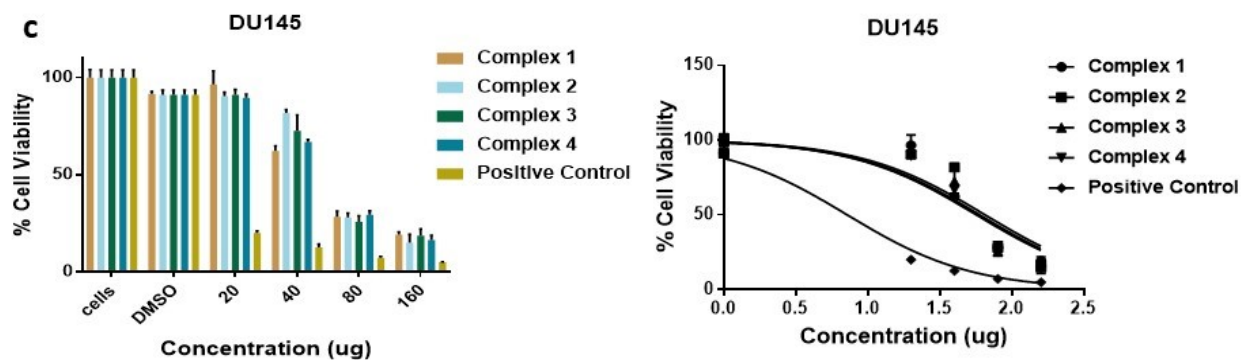

181

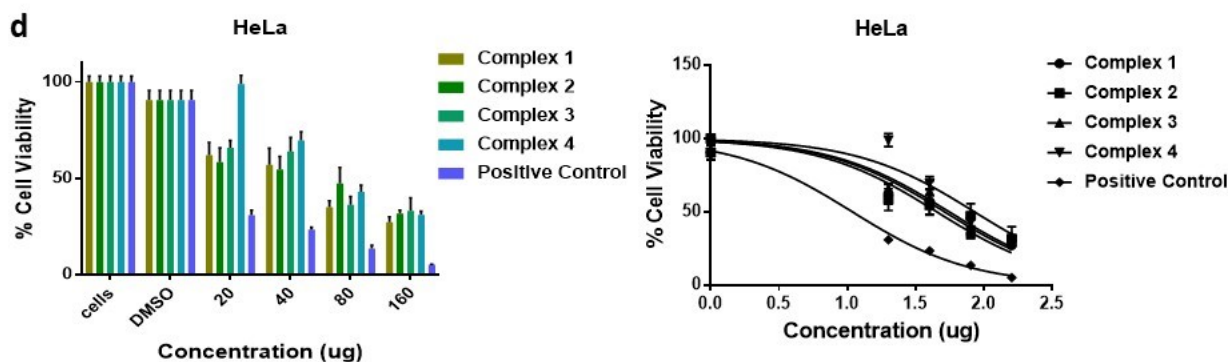

182

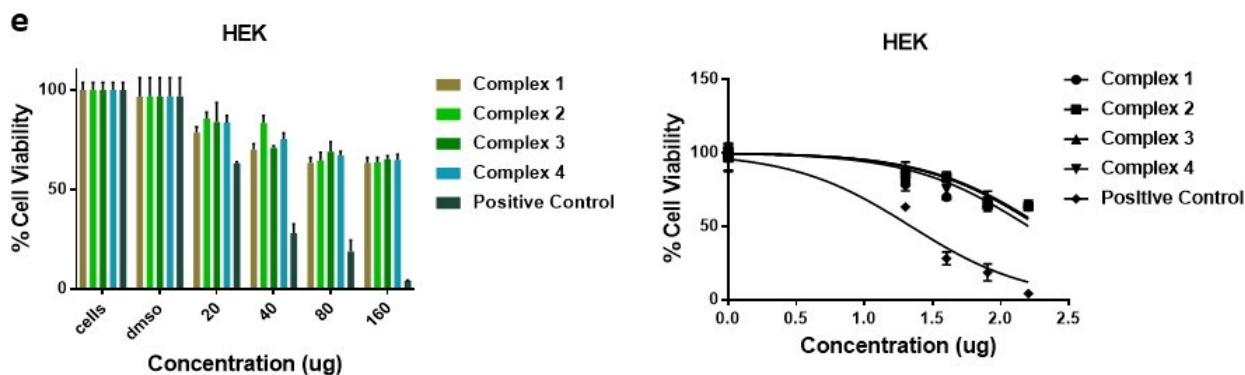

183

184 **Figure S25.** Biocompatibility of **1**, **2**, **3** and **4** on a) A375 cell line, b) MCF7 cell line, c) DU145  
 185 cell line, d) HeLa cell line, e) HEK cell line.

186

## 187 References

- 188 1 A. Bhattacharya, R. Prajapati, S. Chatterjee and T. K. Mukherjee, *Langmuir*, 2014, **30**, 14894–  
 189 14904.
- 190 26.
- 191 3 L. Bao, Z.-L. Zhang, Z.-Q. Tian, L. Zhang, C. Liu, Y. Lin, B. Qi and D.-W. Pang, *Advanced*  
 192 *Materials*, 2011, **23**, 5801–5806.

193 4P. Dahiya, M. Kumbhakar, T. Mukherjee and H. Pal, *Chemical Physics Letters*, 2005, **414**,  
194 148–154.

195 5Substituent dependent sensing behavior of Schiff base chemosensors in detecting Zn<sup>2+</sup>and  
196 Al<sup>3+</sup> ions: Drug sample analysis and living cell imaging - ScienceDirect,  
197 <https://www.sciencedirect.com/science/article/pii/S092540051832029X?via%3Dihub>,  
198 (accessed October 6, 2021).

199 6N. Malviya, C. Sonkar, R. Ganguly, D. Bhattacharjee, K. P. Bhabak and S. Mukhopadhyay,  
200 *ACS Appl. Mater. Interfaces*, 2019, **11**, 47606–47618.

201

202

203
